# Supplementary material for: Preventing Soft Texture Fish Fillets through Brine Injection Technology
Source: Hindawi journal article supplement (doi:10.1155/2017/1875872), 2017-01-01
Supplement: f1 [file 1875872.f1.docx]

**Supplementary Material**


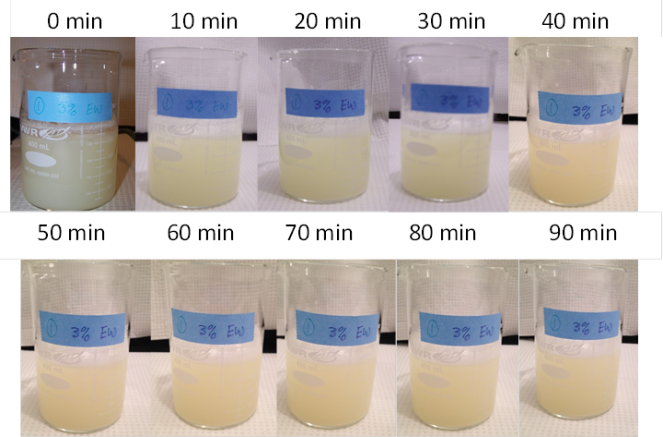


**3% Egg White**

**(a)**


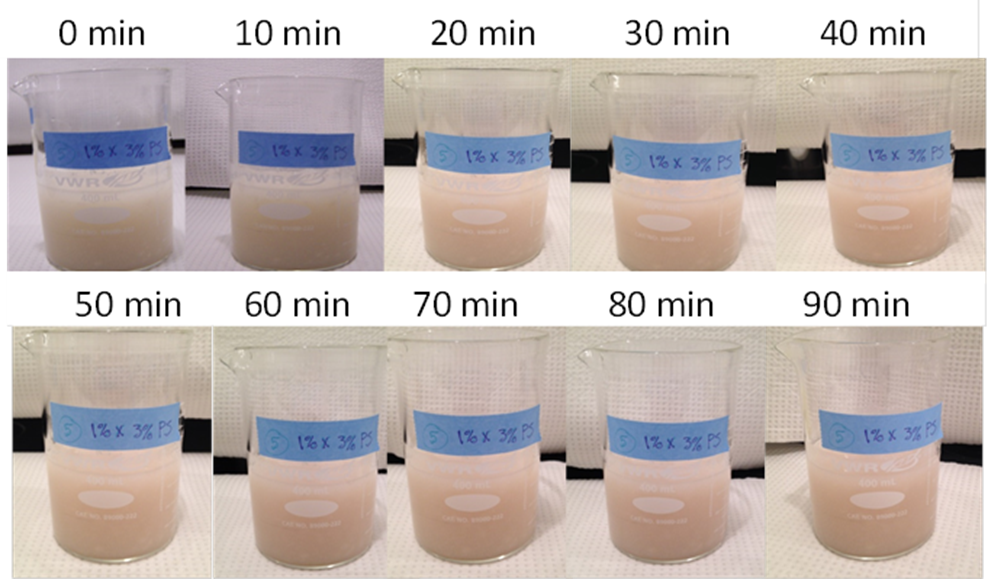


**3% Potato Extract, 1% Xanthan Gum**

**(b)**

Figure (a) Brine containing 3% salt, 3% STTP, and 3% egg white; (b) Brine containing 3% salt, 3% STTP, 3% potato extract and 1% xanthan gum. All brine mixing using chilled water, kept at walk in cooler (4 °C), and photograph every 10 min. 5% EW or PE cannot be mixed well in a beaker. Additionally, 0.1% xanthan gum was used in the study instead of 1% xanthan gum since it is the smallest amount that helps PE to be well-solubilized.
